# Supplementary material for: Prevalence and Predictors of Violence Victimization and Violent Behavior among Youths: A Population-Based Study in Serbia
Source: MDPI journal article supplement (doi:10.3390/ijerph16173203), 2019-09-02
Supplement: s1 [file s1]

## SUPPLEMENTARY MATERIAL

Figure 1. Study framework for analyzing the prevalence and determinants of violence among young people in Serbia age 15-24 years (n = 1448), 2013.

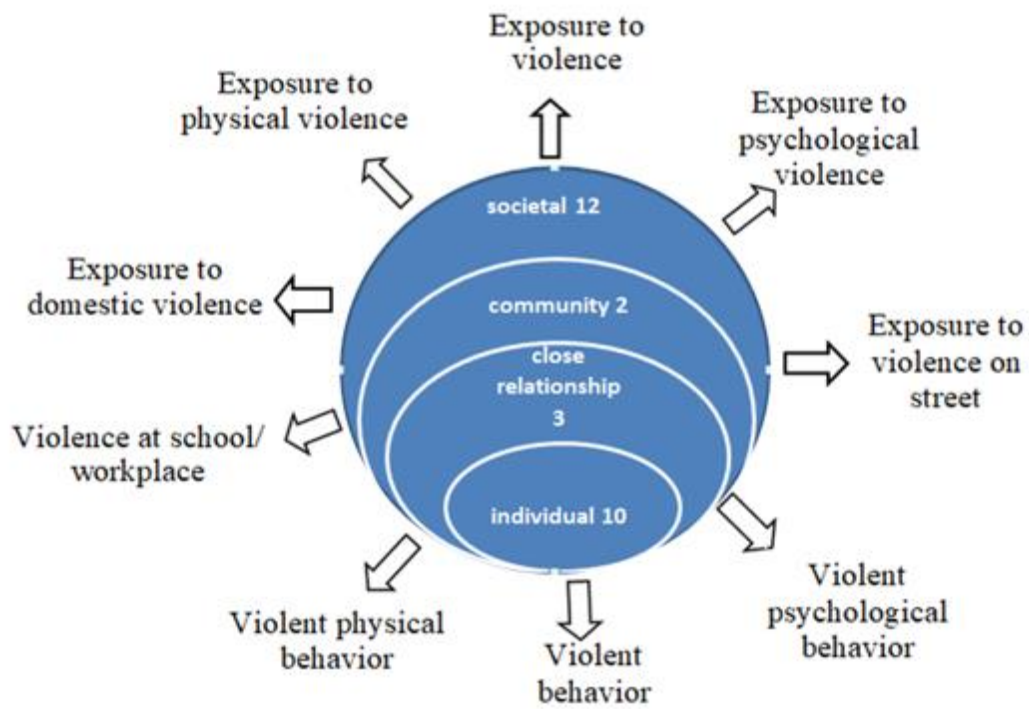

**Table S1. The characteristics of the youth in the representative sample of the National Health Survey 2013, Serbia**

| Characteristics                                                                 | Respondents |                |
|---------------------------------------------------------------------------------|-------------|----------------|
|                                                                                 | n           | %              |
| Individual level                                                                |             |                |
| <b>Sex</b>                                                                      |             |                |
| Male                                                                            | 843         | 49             |
| Female                                                                          | 879         | 51             |
| <b>Age</b>                                                                      |             |                |
| Arithmetic mean $\pm$ standard deviation                                        |             | 19.5 $\pm$ 2.9 |
| 15-19                                                                           | 1031        | 59.9           |
| 20-24                                                                           | 691         | 40.1           |
| <b>Employment status</b>                                                        |             |                |
| Unemployed                                                                      | 1508        | 87.6           |
| Employed                                                                        | 214         | 12.4           |
| <b>Wealth index</b>                                                             |             |                |
| 1 <sup>st</sup> (the lowest)                                                    | 303         | 17.6           |
| 2 <sup>nd</sup>                                                                 | 352         | 20.4           |
| 3 <sup>rd</sup>                                                                 | 337         | 19.6           |
| 4 <sup>th</sup>                                                                 | 357         | 20.7           |
| 5 <sup>th</sup> (the highest)                                                   | 373         | 21.7           |
| <b>Education level</b>                                                          |             |                |
| Primary or lower                                                                | 680         | 39.5           |
| Secondary                                                                       | 963         | 55.9           |
| Tertiary                                                                        | 79          | 4.6            |
| <b>Own health self-perception</b>                                               |             |                |
| Very good                                                                       | 1092        | 63.4           |
| Good                                                                            | 549         | 31.9           |
| Average                                                                         | 67          | 3.9            |
| Bad                                                                             | 11          | 0.6            |
| Very bad                                                                        | 3           | 0.2            |
| <b>Chronic disease</b>                                                          |             |                |
| Yes                                                                             | 125         | 7.3            |
| No                                                                              | 1597        | 92.7           |
| <b>Tobacco smoking</b>                                                          |             |                |
| Yes                                                                             | 324         | 74.1           |
| No                                                                              | 113         | 25.8           |
| Non-response                                                                    | 1285        | 74.6           |
| <b>Binge drinking**</b>                                                         |             |                |
| Yes                                                                             | 568         | 64.1           |
| No                                                                              | 318         | 35.9           |
| Non-response                                                                    | 836         | 48.5           |
| <b>Same-sex intercourse</b>                                                     |             |                |
| Yes                                                                             | 30          | 3.5            |
| No                                                                              | 833         | 96.5           |
| Non-response                                                                    | 859         | 49.9           |
| <b>Close-relationship level</b>                                                 |             |                |
| <b>Marital status</b>                                                           |             |                |
| Single                                                                          | 1552        | 90.1           |
| Married                                                                         | 170         | 9.9            |
| <b>Number of close friends to turn to in case of a serious personal problem</b> |             |                |
| None                                                                            | 12          | 0.7            |
| 1 or 2                                                                          | 421         | 14.4           |
| 3-5                                                                             | 915         | 53.1           |

|                                                                 |                                         |      |
|-----------------------------------------------------------------|-----------------------------------------|------|
| 6 or more                                                       | 374                                     | 21.7 |
| Number of household members (arithmetic mean $\pm$ SD) #        | 4.41 $\pm$ 1.6 (4.33-4.49); Range: 1–15 |      |
| Community level                                                 |                                         |      |
| Type of settlement                                              |                                         |      |
| Urban                                                           | 956                                     | 55.5 |
| Other settlements                                               | 766                                     | 44.5 |
| Region                                                          |                                         |      |
| Vojvodina                                                       | 397                                     | 23.1 |
| Belgrade                                                        | 380                                     | 22.1 |
| Sumadija and Western Serbia                                     | 517                                     | 30.0 |
| Southern and Eastern Serbia                                     | 428                                     | 24.9 |
| Societal level                                                  |                                         |      |
| Neighbors' interest in their life, in what is happening to them |                                         |      |
| Very interested                                                 | 1056                                    | 61.3 |
| Interested                                                      | 552                                     | 32.1 |
| Indifferent                                                     | 73                                      | 4.2  |
| Little interested                                               | 32                                      | 1.9  |
| Not interested                                                  | 9                                       | 0.5  |
| Getting necessary help from neighbor is                         |                                         |      |
| Very easy                                                       | 303                                     | 17.6 |
| Easy                                                            | 649                                     | 37.7 |
| Possible                                                        | 555                                     | 32.2 |
| Difficult                                                       | 174                                     | 10.1 |
| Very difficult                                                  | 41                                      | 2.4  |
| Tracking health information by media                            |                                         |      |
| TV (yes, occasionally)                                          | 979                                     | 56.9 |
| No                                                              | 743                                     | 43.1 |
| Internet (yes, occasionally)                                    | 939                                     | 54.5 |
| No                                                              | 783                                     | 45.5 |
| Newspapers (yes, occasionally)                                  | 621                                     | 36.1 |
| No                                                              | 1101                                    | 63.9 |
| Radio (yes, occasionally)                                       | 327                                     | 19   |
| No                                                              | 1395                                    | 81   |

\*\* Consuming six or more alcoholic beverages in a row.

Table S2. The prevalence of violence victimization in the last 12 months by place and response rate

| Type of violence                                             | Total              | Place of various types of violence victimization |                         |                   |
|--------------------------------------------------------------|--------------------|--------------------------------------------------|-------------------------|-------------------|
|                                                              |                    | In family                                        | At school/<br>workplace | On a street       |
| <b>Only psychological, n (%)</b>                             | 94 (5.5%)          | 5 (2.2%)                                         | <b>98 (6.4)</b>         | 80 (5.2)          |
| <i>Response rate %</i>                                       | 84                 | 91                                               | 89                      | 90                |
| <b>Only physical, n (%)</b>                                  | 18 (1.3%)          | 18 (1.1%)                                        | 29 (1.9%)               | <b>64 (4.1%)</b>  |
| <i>Response rate %</i>                                       | 79                 | 92                                               | 89                      | 90                |
| <b>Combined – Physiological and physical violence, n (%)</b> | <b>207 (13.4%)</b> | 44 (2.8%)                                        | 106 (7.0%)              | <b>112 (7.3%)</b> |
| <i>Response rate %</i>                                       | 90                 | 91                                               | 88                      | 89                |

Table S3. Distribution of respondents according to psychological violence victimization in the last 12 months related to their demographic and other characteristics, young people in Serbia age 15-24 years (n = 1448), 2013.

| Characteristics of respondents            | Psychological violence victims |      |             |      | <i>p</i> * |
|-------------------------------------------|--------------------------------|------|-------------|------|------------|
|                                           | No<br>N=1354                   |      | Yes<br>N=94 |      |            |
|                                           | n                              | %    | n           | %    |            |
| <b>Individual level</b>                   |                                |      |             |      |            |
| <b>Sex</b>                                |                                |      |             |      | 0.920      |
| Female                                    | 641                            | 47.3 | 44          | 46.8 |            |
| Male                                      | 713                            | 52.7 | 50          | 53.2 |            |
| <b>Age</b>                                |                                |      |             |      | 0.509      |
| 15-19                                     | 803                            | 59.3 | 59          | 62.8 |            |
| 20-24                                     | 551                            | 40.7 | 35          | 37.2 |            |
| <b>Employment status</b>                  | 1354                           |      | 94          |      | 0.441      |
| Unemployed                                | 1189                           | 87.8 | 80          | 85.1 |            |
| Employed                                  | 165                            | 12.2 | 14          | 14.9 |            |
| <b>Wealth index</b>                       |                                |      |             |      | 0.303      |
| 1 <sup>st</sup> (the lowest)              | 241                            | 17.8 | 13          | 13.8 |            |
| 2 <sup>nd</sup>                           | 268                            | 19.8 | 16          | 17.0 |            |
| 3 <sup>id</sup>                           | 267                            | 19.7 | 17          | 18.1 |            |
| 4 <sup>th</sup>                           | 300                            | 22.2 | 20          | 21.3 |            |
| 5 <sup>th</sup> the highest)              | 278                            | 20.5 | 28          | 29.8 |            |
| <b>Education level</b>                    |                                |      |             |      | 0.576      |
| Primary or lower                          | 522                            | 38.6 | 33          | 35.1 |            |
| Secondary                                 | 768                            | 56.7 | 58          | 61.7 |            |
| Tertiary                                  | 64                             | 4.7  | 3           | 3.2  |            |
| <b>Psychological violence perpetrator</b> |                                |      |             |      | <0.001     |
| No                                        | 1282                           | 96.3 | 69          | 75.8 |            |
| Yes                                       | 49                             | 3.7  | 22          | 24.2 |            |
| <b>Physical violence perpetrator</b>      |                                |      |             |      | <0.001     |
| No                                        | 1274                           | 95.6 | 81          | 87.1 |            |
| Yes                                       | 58                             | 4.4  | 12          | 12.9 |            |
| <b>Own health self-perception</b>         |                                |      |             |      | 0.012      |
| Very good                                 | 887                            | 65.5 | 49          | 52.1 |            |
| Good                                      | 413                            | 30.5 | 35          | 37.2 |            |
| Average                                   | 48                             | 3.5  | 9           | 9.6  |            |
| Bad                                       | 5                              | 0.4  | 1           | 1.1  |            |
| Very bad                                  | 1                              | 0.1  | 0           | 0.0  |            |
| <b>Chronic disease</b>                    |                                |      |             |      | 0.033      |
| Yes                                       | 93                             | 6.9  | 12          | 12.8 |            |
| No                                        | 1261                           | 93.1 | 82          | 87.2 |            |
| <b>Tobacco smoking</b>                    | 402                            | 100  | 40          | 100  | 0.652      |
| Yes                                       | 317                            | 78.9 | 31          | 77.5 |            |
| No                                        | 85                             | 21.1 | 9           | 22.5 |            |
| <b>Binge drinking**</b>                   | 690                            | 100  | 68          | 100  | 0.214      |
| Yes                                       | 424                            | 61.4 | 47          | 69.1 |            |
| No                                        | 266                            | 38.6 | 21          | 30.9 |            |
| <b>Same -sex intercourse</b>              |                                |      |             |      | 0.295      |
| Yes                                       | 20                             | 2.9  | 3           | 5.5  |            |
| No                                        | 667                            | 97.1 | 52          | 94.5 |            |
| <b>Close-relationship level</b>           |                                |      |             |      |            |
| <b>Marital status</b>                     |                                |      |             |      | 0.919      |
| Single                                    | 1220                           | 90.1 | 85          | 90.4 |            |
| Married                                   | 134                            | 9.9  | 9           | 9.6  |            |

|                                                                                   |      |             |    |             |               |
|-----------------------------------------------------------------------------------|------|-------------|----|-------------|---------------|
| <b>Number of close friends (to turn to in case of a serious personal problem)</b> |      |             |    |             | <b>0.007</b>  |
| None                                                                              | 6    | 0.4         | 3  | 3.2         |               |
| 1 or 2                                                                            | 313  | 23.1        | 25 | 26.6        |               |
| 3-5                                                                               | 733  | 54.1        | 50 | 53.2        |               |
| 6 or more                                                                         | 302  | 22.3        | 16 | 17.0        |               |
| <b>Number of household members</b>                                                |      | 4.45±1.62   |    | 4.11±1.57   | <b>0.049#</b> |
| arithmetic mean ± standard deviation                                              |      | (4.36-4.53) |    | (3.79-4.43) |               |
| (range of arithmetic mean) minimum-maximum                                        |      | (1-15)      |    | (1-9)       |               |
| <b>Community level</b>                                                            |      |             |    |             |               |
| <b>Societal level</b>                                                             |      |             |    |             |               |
| <b>Type of settlement</b>                                                         |      |             |    |             | <b>0.023</b>  |
| Other settlements                                                                 | 610  | 45.1        | 31 | 33.0        |               |
| Urban settlement                                                                  | 744  | 54.9        | 63 | 67.0        |               |
| <b>Region</b>                                                                     |      |             |    |             | 0.535         |
| Vojvodina                                                                         | 317  | 23.4        | 26 | 27.7        |               |
| Belgrade                                                                          | 291  | 21.5        | 20 | 21.3        |               |
| Sumadija and Western Serbia                                                       | 406  | 30.0        | 22 | 23.4        |               |
| Southern and Eastern Serbia                                                       | 340  | 25.1        | 26 | 27.7        |               |
| <b>Neighbors' interest in their life, in what is happening to them</b>            |      |             |    |             | <b>0.007</b>  |
| Very interested                                                                   | 834  | 61.6        | 55 | 58.5        |               |
| Interested                                                                        | 434  | 32.1        | 28 | 29.8        |               |
| Indifferent                                                                       | 59   | 4.4         | 9  | 9.6         |               |
| Little interested                                                                 | 23   | 1.7         | 0  | 0.0         |               |
| Not interested                                                                    | 4    | 0.3         | 2  | 2.1         |               |
| <b>Getting the necessary help from neighbor is</b>                                |      |             |    |             | 0.221         |
| Very easy                                                                         | 251  | 18.5        | 16 | 17.0        |               |
| Easy                                                                              | 516  | 38.1        | 26 | 27.7        |               |
| Possible                                                                          | 434  | 32.1        | 39 | 41.5        |               |
| Difficult                                                                         | 124  | 9.2         | 10 | 10.6        |               |
| Very difficult                                                                    | 29   | 2.1         | 3  | 3.2         |               |
| <b>Tracking health information by media</b>                                       |      |             |    |             |               |
| TV (yes/occasionally)                                                             | 781  | 58.1        | 49 | 52.1        | 0.262         |
| No                                                                                | 564  | 41.9        | 45 | 47.9        |               |
| Internet (yes/occasionally)                                                       | 755  | 56.1        | 59 | 62.8        | 0.196         |
| No                                                                                | 591  | 43.9        | 35 | 37.2        |               |
| Newspapers (yes/occasionally)                                                     | 502  | 37.3        | 38 | 40.4        | 0.536         |
| No                                                                                | 843  | 62.7        | 56 | 59.6        |               |
| Radio (yes/occasionally)                                                          | 267  | 19.8        | 16 | 17.0        | 0.517         |
| No                                                                                | 1079 | 80.2        | 78 | 83.0        |               |

\*Pearson Chi Square test \*\* Consuming six or more alcoholic beverages in a row. # one-way ANOVA F=3,876 df=1.

**Table S4. Distribution of respondents according to physical violence victimization in the last 12 months related to their demographic and other characteristics, young people in Serbia age 15-24 years (n = 1357), 2013.**

| Characteristics of respondents     | Physical violence victims |      |                 |       | p*     |
|------------------------------------|---------------------------|------|-----------------|-------|--------|
|                                    | Not victims<br>N=1339     |      | Victims<br>N=18 |       |        |
|                                    | n                         | %    | n               | %     |        |
| Individual level                   |                           |      |                 |       |        |
| Sex                                |                           |      |                 |       |        |
| Female                             | 634                       | 47.3 | 2               | 11.1  | <0.001 |
| Male                               | 705                       | 52.7 | 16              | 88.9  |        |
| Age                                |                           |      |                 |       |        |
| 15-19                              | 792                       | 59.1 | 14              | 77.8  | 0.110  |
| 20-24                              | 547                       | 40.9 | 4               | 22.2  |        |
| Employment status                  |                           |      |                 |       |        |
| Unemployed                         | 1174                      | 87.7 | 16              | 88.9  | 0.876  |
| Employed                           | 165                       | 12.3 | 2               | 11.1  |        |
| Wealth index                       |                           |      |                 |       |        |
| 1 <sup>st</sup> (the lowest)       | 237                       | 17.7 | 0               | 0.0   | 0.019  |
| 2 <sup>nd</sup>                    | 267                       | 19.9 | 4               | 22.2  |        |
| 3 <sup>rd</sup>                    | 264                       | 19.7 | 3               | 16.7  |        |
| 4 <sup>th</sup>                    | 297                       | 22.2 | 2               | 11.1  |        |
| 5 <sup>th</sup> (the highest)      | 274                       | 20.5 | 9               | 50.0  |        |
| Education level                    |                           |      |                 |       |        |
| Primary or lower                   | 517                       | 38.6 | 7               | 38.9  | 0.981  |
| Secondary                          | 760                       | 56.8 | 10              | 55.6  |        |
| Tertiary                           | 62                        | 4.6  | 1               | 5.6   |        |
| Psychological violence perpetrator |                           |      |                 |       |        |
| No                                 | 1275                      | 96.7 | 14              | 82.4  | 0.001  |
| Yes                                | 43                        | 3.3  | 3               | 17.6  |        |
| Physical violence perpetrator      |                           |      |                 |       |        |
| No                                 | 1267                      | 95.8 | 10              | 55.6  | <0.001 |
| Yes                                | 56                        | 4.2  | 8               | 44.4  |        |
| Own health self-perception         |                           |      |                 |       |        |
| Very good                          | 877                       | 65.5 | 9               | 50.0  | 0.010  |
| Good                               | 408                       | 30.5 | 8               | 44.4  |        |
| Average                            | 48                        | 3.6  | 0               | 0.0   |        |
| Bad                                | 5                         | 0.4  | 1               | 5.6   |        |
| Very bad                           | 1                         | 0.1  | 0               | 0.0   |        |
| Chronic disease                    |                           |      |                 |       |        |
| Yes                                | 93                        | 6.9  | 1               | 5.6   | 0.818  |
| No                                 | 1246                      | 93.1 | 17              | 94.4  |        |
| Tobacco smoking                    |                           |      |                 |       |        |
| Yes                                | 396                       | 100  | 6               | 100   | 0.421  |
| Yes                                | 312                       | 78.8 | 6               | 100.0 |        |
| No                                 | 84                        | 21.2 | 0               | 0.0   |        |
| Binge drinking **                  |                           |      |                 |       |        |
| Yes                                | 681                       | 100  | 16              | 100   | 0.175  |
| Yes                                | 418                       | 61.4 | 13              | 81.3  |        |
| No                                 | 263                       | 38.6 | 3               | 18.8  |        |
| Same-sex intercourse               |                           |      |                 |       |        |
| Yes                                | 20                        | 2.9  | 1               | 7.1   | 0.365  |
| No                                 | 658                       | 97.1 | 13              | 92.9  |        |
| Close-relationship level           |                           |      |                 |       |        |
| Marital status                     |                           |      |                 |       |        |
| Single                             | 1207                      | 90.1 | 16              | 88.9  | 0.859  |
| Married                            | 132                       | 9.9  | 2               | 11.1  |        |

|                                                                                   |      |             |    |             |              |
|-----------------------------------------------------------------------------------|------|-------------|----|-------------|--------------|
| <b>Number of close friends (to turn to in case of a serious personal problem)</b> |      |             |    |             | <b>0.012</b> |
| None                                                                              | 6    | 0.4         | 1  | 5.6         |              |
| 1 or 2                                                                            | 308  | 23.0        | 2  | 11.1        |              |
| 3-5                                                                               | 724  | 54.1        | 12 | 66.7        |              |
| 6 or more                                                                         | 301  | 22.5        | 3  | 16.7        |              |
| <b>Number of household members</b>                                                |      | 4.45±1.620  |    | 3.89±1.023  | 0.145#       |
| arithmetic mean ± standard deviation                                              |      | (4.36-4.53) |    | (3.38-4.40) |              |
| (range of arithmetic mean) minimum-maximum                                        |      | (1-15)      |    | (2-6)       |              |
| <b>Community level</b>                                                            |      |             |    |             |              |
| <b>Type of settlement</b>                                                         |      |             |    |             | 0.053        |
| Other settlements                                                                 | 603  | 45.0        | 4  | 22.2        |              |
| Urban settlement                                                                  | 736  | 55.0        | 14 | 77.8        |              |
| <b>Region</b>                                                                     |      |             |    |             | 0.657        |
| Vojvodina                                                                         | 314  | 23.5        | 5  | 27.8        |              |
| Belgrade                                                                          | 287  | 21.4        | 5  | 27.8        |              |
| Sumadija and Western Serbia                                                       | 404  | 30.2        | 3  | 16.7        |              |
| Southern and Eastern Serbia                                                       | 334  | 24.9        | 5  | 27.8        |              |
| <b>Societal level</b>                                                             |      |             |    |             |              |
| <b>Neighbors' interest in their life, in what is happening to them</b>            |      |             |    |             | 0.819        |
| Very interested                                                                   | 828  | 61.8        | 13 | 72.2        |              |
| Interested                                                                        | 426  | 31.8        | 5  | 27.8        |              |
| Indifferent                                                                       | 59   | 4.4         | 0  | 0.0         |              |
| Little interested                                                                 | 22   | 1.6         | 0  | 0.0         |              |
| Not interested                                                                    | 4    | 0.3         | 0  | 0.0         |              |
| <b>Getting the necessary help from neighbor is</b>                                |      |             |    |             | 0.087        |
| Very easy                                                                         | 246  | 18.4        | 2  | 11.1        |              |
| Easy                                                                              | 514  | 38.4        | 3  | 16.7        |              |
| Possible                                                                          | 427  | 31.9        | 9  | 50.0        |              |
| Difficult                                                                         | 123  | 9.2         | 4  | 22.2        |              |
| Very difficult                                                                    | 29   | 2.2         | 0  | 0.0         |              |
| <b>Tracking health information by media</b>                                       |      |             |    |             |              |
| TV (yes/occasionally)                                                             | 771  | 57.9        | 10 | 58.8        | 0.926        |
| No                                                                                | 561  | 42.1        | 7  | 41.2        |              |
| Internet (yes/occasionally)                                                       | 746  | 56.0        | 12 | 70.6        | 0.274        |
| No                                                                                | 586  | 44.0        | 5  | 29.4        |              |
| Newspapers (yes/occasionally)                                                     | 495  | 37.2        | 7  | 41.2        | 0.680        |
| No                                                                                | 836  | 62.8        | 10 | 58.8        |              |
| Radio (yes/occasionally)                                                          | 263  | 19.7        | 2  | 11.8        | 0.705        |
| No                                                                                | 1069 | 80.3        | 15 | 88.2        |              |

\*Pearson Chi Square test \*\* Consuming six or more alcoholic beverages in a row. # one-way ANOVA F = 2,121; df=1.



**Table S5. Distribution of respondents according to domestic violence victimization in the last 12 months related to their demographic and other characteristics, young people in Serbia age 15-24 years (n = 1567), 2013.**

| Characteristics of respondents             | Domestic violence victims |      |                 |      | p*     |
|--------------------------------------------|---------------------------|------|-----------------|------|--------|
|                                            | Not victims<br>N=1523     |      | Victims<br>N=44 |      |        |
|                                            | n                         | %    | n               | %    |        |
| <b>Individual level</b>                    |                           |      |                 |      |        |
| <b>Sex</b>                                 |                           |      |                 |      | 0.827  |
| Female                                     | 736                       | 48.3 | 22              | 50.0 |        |
| Male                                       | 787                       | 51.7 | 22              | 50.0 |        |
| <b>Age</b>                                 |                           |      |                 |      | 0.442  |
| 15-19                                      | 902                       | 59.2 | 23              | 52.3 |        |
| 20-24                                      | 621                       | 40.8 | 21              | 47.7 |        |
| <b>Employment status</b>                   |                           |      |                 |      | 0.816  |
| Unemployed                                 | 1332                      | 87.5 | 39              | 88.6 |        |
| Employed                                   | 191                       | 12.5 | 5               | 11.4 |        |
| <b>Wealth index</b>                        |                           |      |                 |      | 0.287  |
| 1 <sup>st</sup> (the lowest)               | 265                       | 17.4 | 13              | 29.5 |        |
| 2 <sup>nd</sup>                            | 307                       | 20.2 | 7               | 15.9 |        |
| 3 <sup>rd</sup>                            | 303                       | 19.9 | 6               | 13.6 |        |
| 4 <sup>th</sup>                            | 322                       | 21.1 | 8               | 18.2 |        |
| 5 <sup>th</sup> ( the highest)             | 326                       | 21.4 | 10              | 22.7 |        |
| <b>Education level</b>                     |                           |      |                 |      | 0.452  |
| Primary or lower                           | 586                       | 38.5 | 20              | 45.5 |        |
| Secondary                                  | 866                       | 56.9 | 21              | 47.7 |        |
| Tertiary                                   | 71                        | 4.7  | 3               | 6.8  |        |
| <b>Psychological violence perpetrators</b> |                           |      |                 |      | <0.001 |
| No                                         | 1416                      | 94.8 | 27              | 65.9 |        |
| Yes                                        | 78                        | 5.2  | 14              | 34.1 |        |
| <b>Physical violence perpetrators</b>      |                           |      |                 |      | <0.001 |
| No                                         | 1396                      | 94.0 | 29              | 70.7 |        |
| Yes                                        | 89                        | 6.0  | 12              | 29.3 |        |
| <b>Own health self-perception</b>          |                           |      |                 |      | <0.001 |
| Very good                                  | 978                       | 64.2 | 21              | 47.7 |        |
| Good                                       | 479                       | 31.5 | 15              | 34.1 |        |
| Average                                    | 55                        | 3.6  | 5               | 11.4 |        |
| Bad                                        | 9                         | 0.6  | 2               | 4.5  |        |
| Very bad                                   | 2                         | 0.1  | 1               | 2.3  |        |
| <b>Chronic disease</b>                     |                           |      |                 |      | 0.006  |
| Yes                                        | 109                       | 7.2  | 8               | 18.2 |        |
| No                                         | 1414                      | 92.8 | 36              | 81.8 |        |
| <b>Tobacco smoking</b>                     | 469                       |      | 20              |      | 0.393  |
| Yes                                        | 370                       | 78.9 | 16              | 80.0 |        |
| No                                         | 99                        | 21.1 | 4               | 20.0 |        |
| <b>Binge drinking **</b>                   | 794                       |      | 30              |      | 0.566  |
| Yes                                        | 500                       | 63.0 | 19              | 63.3 |        |
| No                                         | 294                       | 37.0 | 11              | 36.7 |        |
| <b>Same-sex intercourse</b>                |                           |      |                 |      | <0.001 |
| Yes                                        | 78                        | 5.2  | 14              | 34.1 |        |
| No                                         | 1416                      | 94.8 | 27              | 65.9 |        |
| <b>Close-relationship level</b>            |                           |      |                 |      |        |
| <b>Marital status</b>                      |                           |      |                 |      | 0.218  |
| Single                                     | 1368                      | 89.8 | 37              | 84.1 |        |
| Married                                    | 155                       | 10.2 | 7               | 15.9 |        |

|                                                                                   |      |             |    |             |                  |
|-----------------------------------------------------------------------------------|------|-------------|----|-------------|------------------|
| <b>Number of close friends (to turn to in case of a serious personal problem)</b> |      |             |    |             | <b>&lt;0.001</b> |
| None                                                                              | 9    | 0.6         | 2  | 4.5         |                  |
| 1 or 2                                                                            | 358  | 23.5        | 18 | 40.9        |                  |
| 3-5                                                                               | 825  | 54.2        | 13 | 29.5        |                  |
| 6 or more                                                                         | 331  | 21.7        | 11 | 25.0        |                  |
| <b>Number of household members</b>                                                |      | 4.41±1.601  |    | 4.11±1.498  | 0.203#           |
| arithmetic mean ± standard deviation                                              |      | (4.33-4.49) |    | (3.66-4.57) |                  |
| (range of arithmetic mean) minimum-maximum                                        |      | (1-15)      |    | (1-8)       |                  |
| <b>Community level</b>                                                            |      |             |    |             |                  |
| <b>Type of settlement</b>                                                         |      |             |    |             | 0.096            |
| Other settlements                                                                 | 677  | 44.5        | 14 | 31.8        |                  |
| Urban settlement                                                                  | 846  | 55.5        | 30 | 68.2        |                  |
| <b>Region</b>                                                                     |      |             |    |             | 0.683            |
| Vojvodina                                                                         | 356  | 23.4        | 11 | 25.0        |                  |
| Belgrade                                                                          | 327  | 21.5        | 9  | 20.5        |                  |
| Sumadija and Western Serbia                                                       | 454  | 29.8        | 10 | 22.7        |                  |
| Southern and Eastern Serbia                                                       | 386  | 25.3        | 14 | 31.8        |                  |
| <b>Societal level</b>                                                             |      |             |    |             |                  |
| <b>Neighbors' interest in their life, in what is happening to them</b>            |      |             |    |             | 0.004            |
| Very interested                                                                   | 941  | 61.8        | 22 | 50.0        |                  |
| Interested                                                                        | 485  | 31.8        | 13 | 29.5        |                  |
| Indifferent                                                                       | 67   | 4.4         | 5  | 11.4        |                  |
| Little interested                                                                 | 23   | 1.5         | 3  | 6.8         |                  |
| Not interested                                                                    | 7    | 0.5         | 1  | 2.3         |                  |
| <b>Getting the necessary help from neighbor is</b>                                |      |             |    |             | 0.375            |
| Very easy                                                                         | 268  | 17.6        | 6  | 13.6        |                  |
| Easy                                                                              | 571  | 37.5        | 13 | 29.5        |                  |
| Possible                                                                          | 497  | 32.6        | 16 | 36.4        |                  |
| Difficult                                                                         | 150  | 9.8         | 8  | 18.2        |                  |
| Very difficult                                                                    | 37   | 2.4         | 1  | 2.3         |                  |
| <b>Tracking health information by media</b>                                       |      |             |    |             |                  |
| TV (yes/occasionally)                                                             | 869  | 57.4        | 28 | 63.6        | 0.429            |
| No                                                                                | 645  | 42.6        | 16 | 36.4        |                  |
| Internet (yes/occasionally)                                                       | 844  | 55.7        | 26 | 59.1        | 0.403            |
| No                                                                                | 670  | 44.3        | 18 | 40.9        |                  |
| Newspapers (yes/occasionally)                                                     | 554  | 36.6        | 20 | 45.5        | 0.232            |
| No                                                                                | 959  | 63.4        | 24 | 54.5        |                  |
| Radio (yes/occasionally)                                                          | 293  | 19.4        | 12 | 27.3        | 0.214            |
| No                                                                                | 1221 | 80.6        | 32 | 72.7        |                  |

\*Pearson Chi Square test \*\* Consuming six or more alcoholic beverages in a row. # one-way ANOVA F=1.467 df=1.

**Table S6. Distribution of respondents according to violence victimization at school/workplace in the last 12 months related to their demographic and other characteristics, young people in Serbia age 15-24 years (n = 1519), 2013.**

| Characteristics of respondents      | Violence victims at school/workplace |      |       |      | p*     |
|-------------------------------------|--------------------------------------|------|-------|------|--------|
|                                     | No                                   |      | Yes   |      |        |
|                                     | N=1413                               |      | N=106 |      |        |
|                                     | n                                    | %    | n     | %    |        |
| <b>Individual level</b>             |                                      |      |       |      |        |
| Sex                                 |                                      |      |       |      | 0.134  |
| Female                              | 733                                  | 51.9 | 59    | 55.7 |        |
| Male                                | 680                                  | 48.1 | 47    | 44.3 |        |
| Age                                 |                                      |      |       |      | 0.003  |
| 15-19                               | 834                                  | 59.0 | 78    | 73.6 |        |
| 20-24                               | 579                                  | 41.0 | 28    | 26.4 |        |
| Employment status                   |                                      |      |       |      | 0.455  |
| Unemployed                          | 1239                                 | 87.7 | 94    | 88.7 |        |
| Employed                            | 174                                  | 12.3 | 12    | 11.3 |        |
| Wealth index                        |                                      |      |       |      | 0.302  |
| 1 <sup>st</sup> (the lowest)        | 252                                  | 17.8 | 14    | 13.2 |        |
| 2 <sup>nd</sup>                     | 276                                  | 19.5 | 25    | 23.6 |        |
| 3 <sup>rd</sup>                     | 275                                  | 19.5 | 22    | 20.8 |        |
| 4 <sup>th</sup>                     | 309                                  | 21.9 | 17    | 16.0 |        |
| 5 <sup>th</sup> (the highest)       | 301                                  | 21.3 | 28    | 26.4 |        |
| Education level                     |                                      |      |       |      | 0.006  |
| Primary or lower                    | 539                                  | 38.5 | 57    | 53.8 |        |
| Secondary                           | 809                                  | 56.9 | 45    | 42.5 |        |
| Tertiary                            | 65                                   | 4.7  | 4     | 3.8  |        |
| Psychological violence perpetrators |                                      |      |       |      | <0.001 |
| No                                  | 1331                                 | 94.8 | 63    | 63.6 |        |
| Yes                                 | 59                                   | 5.2  | 36    | 36.4 |        |
| Physical violence perpetrators      |                                      |      |       |      | <0.001 |
| No                                  | 1325                                 | 94.0 | 70    | 68.6 |        |
| Yes                                 | 72                                   | 6.0  | 32    | 31.4 |        |
| Own health self-perception          |                                      |      |       |      | <0.001 |
| Very good                           | 917                                  | 64.2 | 52    | 49.1 |        |
| Good                                | 430                                  | 31.5 | 49    | 46.2 |        |
| Average                             | 57                                   | 3.6  | 2     | 1.9  |        |
| Bad                                 | 7                                    | 0.6  | 3     | 2.8  |        |
| Very bad                            | 2                                    | 0.1  | 0     | 0.0  |        |
| Chronic disease                     |                                      |      |       |      | 0.054  |
| Yes                                 | 101                                  | 7.1  | 13    | 12.3 |        |
| No                                  | 1312                                 | 92.9 | 93    | 87.7 |        |
| Tobacco smoking                     |                                      |      |       |      | 0.677  |
| Yes                                 | 251                                  | 73.4 | 31    | 77.5 |        |
| No                                  | 91                                   | 26.6 | 9     | 22.5 |        |
| Binge drinking **                   |                                      |      |       |      | 0.545  |
| Yes                                 | 463                                  | 62.7 | 49    | 66.2 |        |
| No                                  | 276                                  | 37.3 | 25    | 33.8 |        |
| Same-sex intercourse                |                                      |      |       |      | 0.698  |
| Yes                                 | 24                                   | 3.3  | 2     | 4.3  |        |
| No                                  | 706                                  | 96.7 | 44    | 95.7 |        |
| <b>Close-relationship level</b>     |                                      |      |       |      |        |
| Marital status                      |                                      |      |       |      | 0.276  |

|                                                                                   |      |             |    |             |        |
|-----------------------------------------------------------------------------------|------|-------------|----|-------------|--------|
| Single                                                                            | 1274 | 90.2        | 99 | 93.4        |        |
| Married                                                                           | 139  | 9.8         | 7  | 6.6         |        |
| <b>Number of close friends (to turn to in case of a serious personal problem)</b> |      |             |    |             | 0.223  |
| None                                                                              | 10   | 0.7         | 0  | 0.0         |        |
| 1 or 2                                                                            | 329  | 23.3        | 33 | 31.1        |        |
| 3-5                                                                               | 761  | 53.9        | 49 | 46.2        |        |
| 6 or more                                                                         | 313  | 22.2        | 24 | 22.6        |        |
| <b>Number of household members</b>                                                |      | 4.42±1.611  |    | 4.18±1.517  | 0.112# |
| arithmetic mean ± standard deviation                                              |      | (4.34-4.51) |    | (3.89-4.47) |        |
| (range of arithmetic mean) minimum-maximum                                        |      | (1-15)      |    | (1-9)       |        |
| <b>Community level</b>                                                            |      |             |    |             |        |
| <b>Type of settlement</b>                                                         |      |             |    |             | 0.586  |
| Other settlements                                                                 | 788  | 55.8        | 62 | 58.5        |        |
| Urban settlement                                                                  | 625  | 44.2        | 44 | 41.5        |        |
| <b>Region</b>                                                                     |      |             |    |             | 0.561  |
| Vojvodina                                                                         | 329  | 23.3        | 26 | 24.5        |        |
| Belgrade                                                                          | 309  | 21.9        | 17 | 16.0        |        |
| Sumadija and Western Serbia                                                       | 417  | 29.5        | 33 | 31.1        |        |
| Southern and Eastern Serbia                                                       | 358  | 25.3        | 30 | 28.3        |        |
| <b>Societal level</b>                                                             |      |             |    |             |        |
| <b>Neighbors' interest in their life, in what is happening to them</b>            |      |             |    |             | 0.946  |
| Very interested                                                                   | 866  | 61.3        | 65 | 61.3        |        |
| Interested                                                                        | 454  | 32.1        | 35 | 33.0        |        |
| Indifferent                                                                       | 64   | 4.5         | 4  | 3.8         |        |
| Little interested                                                                 | 22   | 1.6         | 2  | 1.9         |        |
| Not interested                                                                    | 7    | 0.5         | 0  | 0.0         |        |
| <b>Getting necessary help from neighbor is</b>                                    |      |             |    |             | 0.698  |
| Very easy                                                                         | 252  | 17.8        | 19 | 17.9        |        |
| Easy                                                                              | 535  | 37.9        | 35 | 33.0        |        |
| Possible                                                                          | 457  | 32.3        | 38 | 35.8        |        |
| Difficult                                                                         | 139  | 9.8         | 10 | 9.4         |        |
| Very difficult                                                                    | 30   | 2.1         | 4  | 3.8         |        |
| <b>Tracking health information by media</b>                                       |      |             |    |             |        |
| TV (yes/occasionally)                                                             | 816  | 58.1        | 53 | 50.5        | 0.311  |
| No                                                                                | 589  | 41.9        | 52 | 49.5        |        |
| Internet (yes/occasionally)                                                       | 791  | 56.3        | 58 | 55.2        | 0.978  |
| No                                                                                | 614  | 43.7        | 47 | 44.8        |        |
| Newspapers (yes/occasionally)                                                     | 529  | 37.7        | 34 | 32.4        | 0.547  |
| No                                                                                | 875  | 62.3        | 71 | 67.6        |        |
| Radio (yes/occasionally)                                                          | 282  | 20.1        | 14 | 13.3        | 0.213  |
| No                                                                                | 1123 | 79.9        | 91 | 86.7        |        |

\*Pearson Chi Square test, \*\* Consuming six or more alcoholic beverages in a row. # one-way ANOVA F=2,307; df=1.

Table S7. Distribution of respondents according to violence victimization on the street in the last 12 months related to their demographic and other characteristics, young people in Serbia age 15-24 years (n = 1519), 2013.

| Characteristics of respondents             | Violence victims on the street |      |              |      | p*               |
|--------------------------------------------|--------------------------------|------|--------------|------|------------------|
|                                            | No<br>N=1427                   |      | Yes<br>N=112 |      |                  |
|                                            | n                              | %    | n            | %    |                  |
| <b>Individual level</b>                    |                                |      |              |      |                  |
| <b>Sex</b>                                 |                                |      |              |      | <b>&lt;0.001</b> |
| Female                                     | 673                            | 47.2 | 33           | 29.5 |                  |
| Male                                       | 754                            | 52.8 | 79           | 70.5 |                  |
| <b>Age</b>                                 |                                |      |              |      | 0.718            |
| 15-19                                      | 853                            | 59.8 | 65           | 58.0 |                  |
| 20-24                                      | 574                            | 40.2 | 47           | 42.0 |                  |
| <b>Employment status</b>                   |                                |      |              |      | 0.941            |
| Unemployed                                 | 1252                           | 87.7 | 98           | 87.5 |                  |
| Employed                                   | 175                            | 12.3 | 14           | 12.5 |                  |
| <b>Wealth index</b>                        |                                |      |              |      | <b>0.005</b>     |
| 1 <sup>st</sup> (the lowest)               | 249                            | 17.4 | 17           | 15.2 |                  |
| 2 <sup>nd</sup>                            | 287                            | 20.1 | 19           | 17.0 |                  |
| 3 <sup>rd</sup>                            | 283                            | 19.8 | 20           | 17.9 |                  |
| 4 <sup>th</sup>                            | 313                            | 21.9 | 16           | 14.3 |                  |
| 5 <sup>th</sup> (the highest)              | 295                            | 20.7 | 40           | 35.7 |                  |
| <b>Education level</b>                     |                                |      |              |      | 0.459            |
| Primary or lower                           | 556                            | 39.0 | 37           | 33.0 |                  |
| Secondary                                  | 805                            | 56.4 | 69           | 61.6 |                  |
| Tertiary                                   | 66                             | 4.6  | 6            | 5.4  |                  |
| <b>Psychological violence perpetrators</b> |                                |      |              |      | <b>&lt;0.001</b> |
| No                                         | 1343                           | 95.8 | 61           | 58.7 |                  |
| Yes                                        | 59                             | 4.2  | 43           | 41.3 |                  |
| <b>Physical violence perpetrators</b>      |                                |      |              |      | <b>&lt;0.001</b> |
| No                                         | 1337                           | 95.0 | 66           | 65.3 |                  |
| Yes                                        | 71                             | 5.0  | 35           | 34.7 |                  |
| <b>Own health self-perception</b>          |                                |      |              |      | <b>&lt;0.001</b> |
| Very good                                  | 919                            | 64.4 | 65           | 58.0 |                  |
| Good                                       | 447                            | 31.3 | 34           | 30.4 |                  |
| Average                                    | 53                             | 3.7  | 8            | 7.1  |                  |
| Bad                                        | 7                              | 0.5  | 4            | 3.6  |                  |
| Very bad                                   | 1                              | 0.1  | 1            | 0.9  |                  |
| <b>Chronic disease</b>                     |                                |      |              |      | 0.342            |
| Yes                                        | 105                            | 7.4  | 11           | 9.8  |                  |
| No                                         | 1322                           | 92.6 | 101          | 90.2 |                  |
| <b>Tobacco smoking</b>                     | 426                            | 100  | 59           | 100  | 0.166            |
| Yes                                        | 333                            | 78.2 | 52           | 88.1 |                  |
| No                                         | 93                             | 21.8 | 7            | 11.9 |                  |
| <b>Binge drinking **</b>                   | 738                            | 100  | 89           | 100  | 0.004            |
| Yes                                        | 456                            | 61.8 | 69           | 77.5 |                  |
| No                                         | 282                            | 38.2 | 20           | 22.5 |                  |
| <b>Same-sex intercourse</b>                | 720                            | 100  | 81           | 100  | 0.166            |
| Yes                                        | 23                             | 3.2  | 5            | 6.2  |                  |
| No                                         | 697                            | 96.8 | 76           | 93.8 |                  |
| <b>Close-relationship level</b>            |                                |      |              |      |                  |
| <b>Marital status</b>                      |                                |      |              |      | 0.701            |
| Single                                     | 1290                           | 90.4 | 100          | 89.3 |                  |
| Married                                    | 137                            | 9.6  | 12           | 10.7 |                  |

|                                                                                   |      |             |    |             |                  |
|-----------------------------------------------------------------------------------|------|-------------|----|-------------|------------------|
| <b>Number of close friends (to turn to in case of a serious personal problem)</b> |      |             |    |             | <b>0.015</b>     |
| None                                                                              | 7    | 0.5         | 3  | 2.7         |                  |
| 1 or 2                                                                            | 334  | 23.4        | 33 | 29.5        |                  |
| 3-5                                                                               | 767  | 53.7        | 56 | 50.0        |                  |
| 6 or more                                                                         | 319  | 22.4        | 20 | 17.9        |                  |
| <b>Number of household members</b>                                                |      | 4.43±1.613  |    | 4.09±1.430  | 0.128#           |
| arithmetic mean ± standard deviation                                              |      | (4.35-4.51) |    | (3.82-4.36) |                  |
| (range of arithmetic mean) minimum-maximum                                        |      | (1-15)      |    | (1-8)       |                  |
| <b>Community level</b>                                                            |      |             |    |             |                  |
| <b>Type of settlement</b>                                                         |      |             |    |             | <b>&lt;0.001</b> |
| Other settlements                                                                 | 642  | 45.0        | 30 | 26.8        |                  |
| Urban settlement                                                                  | 785  | 55.0        | 82 | 73.2        |                  |
| <b>Region</b>                                                                     |      |             |    |             | 0.374            |
| Vojvodina                                                                         | 334  | 23.4        | 25 | 22.3        |                  |
| Belgrade                                                                          | 304  | 21.3        | 29 | 25.9        |                  |
| Sumadija and Western Serbia                                                       | 428  | 30.0        | 26 | 23.2        |                  |
| Southern and Eastern Serbia                                                       | 361  | 25.3        | 32 | 28.6        |                  |
| <b>Societal level</b>                                                             |      |             |    |             |                  |
| <b>Neighbors' interest in their life, in what is happening to them</b>            |      |             |    |             | <b>&lt;0.001</b> |
| Very interested                                                                   | 888  | 62.2        | 54 | 48.2        |                  |
| Interested                                                                        | 449  | 31.5        | 48 | 42.9        |                  |
| Indifferent                                                                       | 64   | 4.5         | 4  | 3.6         |                  |
| Little interested                                                                 | 22   | 1.5         | 3  | 2.7         |                  |
| Not interested                                                                    | 4    | 0.3         | 3  | 2.7         |                  |
| <b>Getting necessary help from neighbor is</b>                                    |      |             |    |             | <b>&lt;0.001</b> |
| Very easy                                                                         | 258  | 18.1        | 14 | 12.5        |                  |
| Easy                                                                              | 544  | 38.1        | 34 | 30.4        |                  |
| Possible                                                                          | 464  | 32.5        | 36 | 32.1        |                  |
| Difficult                                                                         | 131  | 9.2         | 21 | 18.8        |                  |
| Very difficult                                                                    | 30   | 2.1         | 7  | 6.3         |                  |
| <b>Tracking health information by media</b>                                       |      |             |    |             |                  |
| TV (yes/occasionally)                                                             | 818  | 57.6        | 66 | 59.5        | 0.832            |
| No                                                                                | 602  | 42.4        | 45 | 40.5        |                  |
| Internet (yes/occasionally)                                                       | 279  | 19.6        | 24 | 21.6        | 0.712            |
| No                                                                                | 1141 | 80.4        | 87 | 78.4        |                  |
| Newspapers (yes/occasionally)                                                     | 528  | 37.2        | 40 | 36.0        | 0.824            |
| No                                                                                | 891  | 62.8        | 71 | 64.0        |                  |
| Radio (yes/occasionally)                                                          | 797  | 56.1        | 66 | 59.5        | 0.214            |
| No                                                                                | 623  | 43.9        | 45 | 40.5        |                  |

\*Pearson Chi Square test , \*\* Consuming six or more alcoholic beverages in a row. # one-way ANOVA F=4,714; df=1.

Table S8. Distribution of respondents according to violence perpetration in the last 12 months in relation to their demographic and other characteristics, young people in Serbia age 15-24 years (n = 1574), 2013.

| Characteristics of respondents                                             | Violence perpetrators |      |             |      | p*     |
|----------------------------------------------------------------------------|-----------------------|------|-------------|------|--------|
|                                                                            | No (N=1397)           |      | Yes (N=177) |      |        |
|                                                                            | n                     | %    | n           | %    |        |
| Individual level                                                           |                       |      |             |      |        |
| Sex                                                                        |                       |      |             |      | <0.001 |
| Female                                                                     | 752                   | 53.8 | 55          | 31.1 |        |
| Male                                                                       | 645                   | 46.2 | 122         | 68.9 |        |
| Age                                                                        |                       |      |             |      | 0.289  |
| 15-19                                                                      | 826                   | 59.1 | 112         | 63.3 |        |
| 20-24                                                                      | 571                   | 40.9 | 65          | 36.7 |        |
| Employment status                                                          |                       |      |             |      | 0.061  |
| Unemployed                                                                 | 1218                  | 87.2 | 163         | 92.1 |        |
| Employed                                                                   | 179                   | 12.8 | 14          | 7.9  |        |
| Wealth index                                                               |                       |      |             |      | 0.080  |
| 1 <sup>st</sup> (the lowest)                                               | 251                   | 18.0 | 29          | 16.4 |        |
| 2 <sup>nd</sup>                                                            | 285                   | 20.4 | 32          | 18.1 |        |
| 3 <sup>rd</sup>                                                            | 277                   | 19.8 | 29          | 16.4 |        |
| 4 <sup>th</sup>                                                            | 297                   | 21.3 | 34          | 19.2 |        |
| 5 <sup>th</sup> (the highest)                                              | 287                   | 20.5 | 53          | 29.9 |        |
| Education level                                                            |                       |      |             |      | 0.720  |
| Primary or lower                                                           | 540                   | 38.7 | 74          | 41.8 |        |
| Secondary                                                                  | 791                   | 56.6 | 95          | 53.7 |        |
| Tertiary                                                                   | 66                    | 4.7  | 8           | 4.5  |        |
| Own health self-perception                                                 |                       |      |             |      | <0.001 |
| Very good                                                                  | 901                   | 64.5 | 91          | 51.4 |        |
| Good                                                                       | 436                   | 31.2 | 70          | 39.5 |        |
| Average                                                                    | 51                    | 3.7  | 11          | 6.2  |        |
| Bad                                                                        | 8                     | 0.6  | 3           | 1.7  |        |
| Very bad                                                                   | 1                     | 0.1  | 2           | 1.1  |        |
| Chronic disease                                                            |                       |      |             |      | 0.451  |
| Yes                                                                        | 104                   | 7.4  | 16          | 9.0  |        |
| No                                                                         | 1293                  | 92.6 | 161         | 91.0 |        |
| Tobacco smoking                                                            |                       |      |             |      | 0.359  |
| Yes                                                                        | 329                   | 79.1 | 67          | 82.7 |        |
| No                                                                         | 87                    | 20.9 | 14          | 17.3 |        |
| Binge drinking **                                                          |                       |      |             |      | <0.001 |
| Yes                                                                        | 429                   | 60.5 | 107         | 79.9 |        |
| No                                                                         | 280                   | 39.5 | 27          | 20.1 |        |
| Same-sex intercourse                                                       |                       |      |             |      | 0.001  |
| Yes                                                                        | 18                    | 2.6  | 10          | 9.0  |        |
| No                                                                         | 686                   | 97.4 | 101         | 91.0 |        |
| Close-relationship level                                                   |                       |      |             |      |        |
| Marital status                                                             |                       |      |             |      | 0.006  |
| Single                                                                     | 1251                  | 89.5 | 170         | 96.0 |        |
| Married                                                                    | 146                   | 10.5 | 7           | 4.0  |        |
| Number of close friends (to turn to in case of a serious personal problem) |                       |      |             |      |        |
| None                                                                       | 9                     | 0.6  | 2           | 1.1  | 0.832  |
| 1 or 2                                                                     | 337                   | 24.1 | 46          | 26.0 |        |
| 3-5                                                                        | 743                   | 53.2 | 91          | 51.4 |        |
| 6 or more                                                                  | 308                   | 22.0 | 38          | 21.5 |        |

|                                                                        |      |                  |     |                  |               |
|------------------------------------------------------------------------|------|------------------|-----|------------------|---------------|
| <b>Number of household members</b>                                     |      |                  |     |                  |               |
| arithmetic mean $\pm$ standard deviation                               |      | 4.42 $\pm$ 1.610 |     | 4.18 $\pm$ 1.553 |               |
| (range of arithmetic mean) minimum-                                    |      | (4.34-4.51)      |     | (3.95-4.41)      | <b>0.042#</b> |
| maximum                                                                |      | (1-15)           |     | (1-12)           |               |
| <b>Community level</b>                                                 |      |                  |     |                  |               |
| <b>Type of settlement</b>                                              |      |                  |     |                  | 0.115         |
| Other settlements                                                      | 624  | 44.7             | 68  | 38.4             |               |
| Urban settlement                                                       | 773  | 55.3             | 109 | 61.6             |               |
| <b>Region</b>                                                          |      |                  |     |                  | 0.553         |
| Vojvodina                                                              | 330  | 23.6             | 36  | 20.3             |               |
| Belgrade                                                               | 299  | 21.4             | 42  | 23.7             |               |
| Sumadija and Western Srrbia                                            | 412  | 29.5             | 48  | 27.1             |               |
| Southern and Eastern Serbia                                            | 356  | 25.5             | 51  | 28.8             |               |
| <b>Societal level</b>                                                  |      |                  |     |                  |               |
| <b>Neighbors' interest in their life, in what is happening to them</b> |      |                  |     |                  | 0.761         |
| Very interested                                                        | 857  | 61.3             | 107 | 60.5             |               |
| Interested                                                             | 444  | 31.8             | 60  | 33.9             |               |
| Indifferent                                                            | 66   | 4.7              | 5   | 2.8              |               |
| Little interested                                                      | 25   | 1.8              | 4   | 2.3              |               |
| Not interested                                                         | 5    | 0.4              | 1   | 0.6              |               |
| <b>Getting the necessary help from neighbor is</b>                     |      |                  |     |                  | 0.142         |
| Very easy                                                              | 251  | 18.0             | 29  | 17.9             |               |
| Easy                                                                   | 522  | 37.4             | 64  | 33.0             |               |
| Possible                                                               | 459  | 32.9             | 52  | 35.8             |               |
| Difficult                                                              | 135  | 9.7              | 24  | 9.4              |               |
| Very difficult                                                         | 30   | 2.1              | 8   | 3.8              |               |
| <b>Tracking health information by media</b>                            |      |                  |     |                  |               |
| <i>TV</i> (Yes/occasionally)                                           | 819  | 59.0             | 88  | 50.5             | 0.068         |
| No                                                                     | 569  | 41.0             | 87  | 49.5             |               |
| <i>Internet</i> (Yes/occasionally)                                     | 772  | 55.6             | 102 | 55.2             | 0.773         |
| No                                                                     | 617  | 44.4             | 73  | 44.8             |               |
| <i>Newspapers</i> (Yes/occasionally)                                   | 525  | 37.8             | 55  | 32.4             | 0.205         |
| No                                                                     | 863  | 62.2             | 120 | 67.6             |               |
| <i>Radio</i> (Yes/occasionally)                                        | 278  | 20.0             | 30  | 13.3             | 0.464         |
| No                                                                     | 1111 | 80.0             | 145 | 86.7             |               |

\*Pearson Chi Square test , \*\* Consuming six or more alcoholic beverages in a row. # one-way ANOVA F=3,565; df=1.



Table S9. Distribution of respondents according to only psychological violence perpetration in the last 12 months according to their demographic and other characteristics, young people in Serbia age 15-24 years (n = 1586), 2013.

| Characteristics of respondents                                             | Psychological violence perpetrators |      |             |      | p*     |
|----------------------------------------------------------------------------|-------------------------------------|------|-------------|------|--------|
|                                                                            | No (N=1475)                         |      | Yes (N=111) |      |        |
|                                                                            | n                                   | %    | n           | %    |        |
| Individual level                                                           |                                     |      |             |      |        |
| Sex                                                                        |                                     |      |             |      | 0.005  |
| Female                                                                     | 777                                 | 52.7 | 43          | 38.7 |        |
| Male                                                                       | 698                                 | 47.3 | 68          | 61.3 |        |
| Age                                                                        |                                     |      |             |      | 0.224  |
| 15-19                                                                      | 870                                 | 59.0 | 72          | 64.9 |        |
| 20-24                                                                      | 605                                 | 41.0 | 39          | 35.1 |        |
| Employment status                                                          |                                     |      |             |      | 0.087  |
| Unemployed                                                                 | 1287                                | 87.3 | 103         | 92.8 |        |
| Employed                                                                   | 188                                 | 12.7 | 8           | 7.2  |        |
| Wealth index                                                               |                                     |      |             |      | 0.038  |
| 1 <sup>st</sup> (the lowest)                                               | 259                                 | 17.6 | 18          | 16.2 |        |
| 2 <sup>nd</sup>                                                            | 302                                 | 20.5 | 19          | 17.1 |        |
| 3 <sup>rd</sup>                                                            | 296                                 | 20.1 | 16          | 14.4 |        |
| 4 <sup>th</sup>                                                            | 312                                 | 21.2 | 21          | 18.9 |        |
| 5 <sup>th</sup> (the highest)                                              | 306                                 | 20.7 | 37          | 33.3 |        |
| Education level                                                            |                                     |      |             |      | 0.137  |
| Primary or lower                                                           | 564                                 | 38.2 | 53          | 47.7 |        |
| Secondary                                                                  | 840                                 | 56.9 | 53          | 47.7 |        |
| Tertiary                                                                   | 71                                  | 4.8  | 5           | 4.5  |        |
| Physical violence perpetrator                                              |                                     |      |             |      | <0.001 |
| No                                                                         | 1397                                | 96.3 | 52          | 53.1 |        |
| Yes                                                                        | 53                                  | 3.7  | 46          | 46.9 |        |
| Own health self-perception                                                 |                                     |      |             |      | <0.001 |
| Very good                                                                  | 947                                 | 64.2 | 56          | 50.5 |        |
| Good                                                                       | 466                                 | 31.6 | 42          | 37.8 |        |
| Average                                                                    | 53                                  | 3.6  | 8           | 7.2  |        |
| Bad                                                                        | 8                                   | 0.5  | 3           | 2.7  |        |
| Very bad                                                                   | 1                                   | 0.1  | 2           | 1.8  |        |
| Chronic disease                                                            |                                     |      |             |      | 0.037  |
| Yes                                                                        | 106                                 | 7.2  | 14          | 12.6 |        |
| No                                                                         | 1369                                | 92.8 | 97          | 87.4 |        |
| Tobacco smoking                                                            | 454                                 | 100  | 50          | 100  | 0.141  |
| Yes                                                                        | 358                                 | 78.9 | 44          | 88.0 |        |
| No                                                                         | 96                                  | 21.1 | 6           | 12.0 |        |
| Binge drinking **                                                          | 760                                 | 100  | 83          | 100  | 0.025  |
| Yes                                                                        | 473                                 | 62.2 | 62          | 74.7 |        |
| No                                                                         | 287                                 | 37.8 | 21          | 25.3 |        |
| Same-sex intercourse                                                       | 761                                 | 100  | 61          | 100  | 0.020  |
| Yes                                                                        | 21                                  | 2.8  | 5           | 8.2  |        |
| No                                                                         | 740                                 | 97.2 | 56          | 91.8 |        |
| Close-relationship level                                                   |                                     |      |             |      |        |
| Marital status                                                             |                                     |      |             |      | 0.046  |
| Single                                                                     | 1322                                | 89.6 | 106         | 95.5 |        |
| Married                                                                    | 153                                 | 10.4 | 5           | 4.5  |        |
| Number of close friends (to turn to in case of a serious personal problem) |                                     |      |             |      | 0.985  |
| None                                                                       | 10                                  | 0.7  | 1           | 0.9  |        |

|                                                                        |      |             |    |             |         |
|------------------------------------------------------------------------|------|-------------|----|-------------|---------|
| 1 or 2                                                                 | 360  | 24.4        | 27 | 24.3        |         |
| 3-5                                                                    | 783  | 53.1        | 60 | 54.1        |         |
| 6 or more                                                              | 322  | 21.8        | 23 | 20.7        |         |
| <b>Number of household members</b>                                     |      | 4.44±1.629  |    | 3.86±1.022  | <0.001# |
| arithmetic mean ± standard deviation                                   |      | (4.36-4.52) |    | (3.67-4.06) |         |
| (range of arithmetic mean) minimum-maximum                             |      | (1-15)      |    | (1-7)       |         |
| <b>Community level</b>                                                 |      |             |    |             |         |
| <b>Type of settlement</b>                                              |      |             |    |             | 0.097   |
| Other settlements                                                      | 651  | 44.1        | 40 | 36.0        |         |
| Urban settlement                                                       | 824  | 55.9        | 71 | 64.0        |         |
| <b>Region</b>                                                          |      |             |    |             | 0.927   |
| Vojvodina                                                              | 344  | 23.3        | 25 | 22.5        |         |
| Belgrade                                                               | 319  | 21.6        | 26 | 23.4        |         |
| Sumadija and Western Serbia                                            | 434  | 29.4        | 30 | 27.0        |         |
| Southern and Eastern Serbia                                            | 378  | 25.6        | 30 | 27.0        |         |
| <b>Societal level</b>                                                  |      |             |    |             |         |
| <b>Neighbors' interest in their life, in what is happening to them</b> |      |             |    |             | 0.892   |
| Very interested                                                        | 902  | 61.2        | 66 | 59.5        |         |
| Interested                                                             | 473  | 32.1        | 39 | 35.1        |         |
| Indifferent                                                            | 68   | 4.6         | 4  | 3.6         |         |
| Little interested                                                      | 25   | 1.7         | 2  | 1.8         |         |
| Not interested                                                         | 7    | 0.5         | 0  | 0.0         |         |
| <b>Getting the necessary help from neighbor is</b>                     |      |             |    |             | 0.184   |
| Very easy                                                              | 261  | 17.7        | 19 | 17.1        |         |
| Easy                                                                   | 548  | 37.2        | 37 | 33.3        |         |
| Possible                                                               | 486  | 32.9        | 33 | 29.7        |         |
| Difficult                                                              | 144  | 9.8         | 19 | 17.1        |         |
| Very difficult                                                         | 36   | 2.4         | 3  | 2.7         |         |
| <b>Tracking health information by media</b>                            |      |             |    |             |         |
| TV (yes/occasionally)                                                  | 853  | 58.2        | 60 | 54.5        | 0.733   |
| No                                                                     | 612  | 41.8        | 50 | 45.5        |         |
| Internet (yes/occasionally)                                            | 812  | 55.4        | 65 | 59.1        | 0.408   |
| No                                                                     | 654  | 44.6        | 45 | 40.9        |         |
| Newspapers (yes/occasionally)                                          | 544  | 37.1        | 39 | 35.5        | 0.914   |
| No                                                                     | 921  | 62.9        | 71 | 64.5        |         |
| Radio (yes/occasionally)                                               | 287  | 19.6        | 14 | 14.0        | 0.631   |
| No                                                                     | 1179 | 80.4        | 86 | 86.0        |         |

\*Pearson Chi Square test, \*\* Consuming six or more alcoholic beverages in a row. # one-way ANOVA F=13.471; df=1.

Table S10. Respondents characteristic according to physical violence perpetration in the last 12 months, young people in Serbia age 15-24 years (n = 1571), 2013.

| Characteristics of respondents                                             | Physically violent behavior |      |             |      | p*     |
|----------------------------------------------------------------------------|-----------------------------|------|-------------|------|--------|
|                                                                            | No (N=1459)                 |      | Yes (N=112) |      |        |
|                                                                            | n                           | %    | n           | %    |        |
| Individual level                                                           |                             |      |             |      |        |
| Sex                                                                        |                             |      |             |      | <0.001 |
| Female                                                                     | 781                         | 53.5 | 21          | 18.8 |        |
| Male                                                                       | 678                         | 46.5 | 91          | 81.3 |        |
| Age                                                                        |                             |      |             |      | 0.811  |
| 15-19                                                                      | 869                         | 59.6 | 69          | 61.1 |        |
| 20-24                                                                      | 590                         | 40.4 | 44          | 38.9 |        |
| Employment status                                                          |                             |      |             |      | 0.399  |
| Unemployed                                                                 | 1276                        | 87.5 | 101         | 90.2 |        |
| Employed                                                                   | 183                         | 12.5 | 11          | 9.8  |        |
| Wealth index                                                               |                             |      |             |      | 0.134  |
| 1 <sup>st</sup> (the lowest)                                               | 261                         | 17.9 | 18          | 15.9 |        |
| 2 <sup>nd</sup>                                                            | 297                         | 20.4 | 19          | 16.8 |        |
| 3 <sup>rd</sup>                                                            | 284                         | 19.5 | 22          | 19.5 |        |
| 4 <sup>th</sup>                                                            | 311                         | 21.3 | 19          | 16.8 |        |
| 5 <sup>th</sup> (the highest)                                              | 306                         | 21.0 | 35          | 31.0 |        |
| Education level                                                            |                             |      |             |      | 0.757  |
| Primary or lower                                                           | 571                         | 39.1 | 40          | 35.7 |        |
| Secondary                                                                  | 820                         | 56.2 | 66          | 58.9 |        |
| Tertiary                                                                   | 68                          | 4.7  | 6           | 5.4  |        |
| Psychological violence perpetrator                                         |                             |      |             |      | <0.001 |
| No                                                                         | 1397                        | 96.4 | 53          | 53.5 |        |
| Yes                                                                        | 52                          | 3.6  | 46          | 46.5 |        |
| Own health self-perception                                                 |                             |      |             |      | 0.118  |
| Very good                                                                  | 933                         | 63.9 | 63          | 56.3 |        |
| Good                                                                       | 458                         | 31.4 | 42          | 37.5 |        |
| Average                                                                    | 57                          | 3.9  | 4           | 3.6  |        |
| Bad                                                                        | 9                           | 0.6  | 2           | 1.8  |        |
| Very bad                                                                   | 2                           | 0.1  | 1           | 0.9  |        |
| Chronic disease                                                            |                             |      |             |      | 0.878  |
| Yes                                                                        | 110                         | 7.5  | 8           | 7.1  |        |
| No                                                                         | 1349                        | 92.5 | 104         | 92.9 |        |
| Tobacco smoking                                                            | 440                         | 100  | 55          | 100  | 0.928  |
| Yes                                                                        | 349                         | 79.3 | 43          | 78.2 |        |
| No                                                                         | 91                          | 20.7 | 12          | 21.8 |        |
| Binge drinking **                                                          | 750                         | 100  | 91          | 100  | <0.001 |
| Yes                                                                        | 460                         | 61.3 | 75          | 82.4 |        |
| No                                                                         | 290                         | 38.7 | 16          | 17.6 |        |
| Same-sex intercourse                                                       | 733                         | 100  | 79          | 100  | 0.117  |
| Yes                                                                        | 22                          | 3.0  | 5           | 6.3  |        |
| No                                                                         | 711                         | 97.0 | 74          | 93.7 |        |
| Close-relationship level                                                   |                             |      |             |      |        |
| Marital status                                                             |                             |      |             |      | 0.023  |
| Single                                                                     | 1311                        | 89.9 | 108         | 96.4 |        |
| Married                                                                    | 148                         | 10.1 | 4           | 3.6  |        |
| Number of close friends (to turn to in case of a serious personal problem) |                             |      |             |      | 0.551  |
| None                                                                       | 9                           | 0.6  | 2           | 1.8  |        |
| 1 or 2                                                                     | 354                         | 24.3 | 28          | 25.0 |        |
| 3-5                                                                        | 774                         | 53.1 | 58          | 51.8 |        |

|                                                                        |      |             |    |             |        |
|------------------------------------------------------------------------|------|-------------|----|-------------|--------|
| 6 or more                                                              | 322  | 22.1        | 24 | 21.4        |        |
| <b>Number of household members</b>                                     |      | 4.39±1.596  |    | 4.43±1.707  | 0.820# |
| arithmetic mean ± standard deviation                                   |      | (4.31-4.47) |    | (4.11-4.75) |        |
| (range of arithmetic mean) minimum-maximum                             |      | (1-15)      |    | (1-12)      |        |
| <b>Community level</b>                                                 |      |             |    |             |        |
| <b>Type of settlement</b>                                              |      |             |    |             | 0.416  |
| Other settlements                                                      | 644  | 44.1        | 45 | 40.2        |        |
| Urban settlement                                                       | 815  | 55.9        | 67 | 59.8        |        |
| <b>Region</b>                                                          |      |             |    |             | 0.262  |
| Vojvodina                                                              | 347  | 23.8        | 20 | 17.9        |        |
| Belgrade                                                               | 312  | 21.4        | 28 | 25.0        |        |
| Sumadija and Western Serbia                                            | 429  | 29.4        | 29 | 25.9        |        |
| Southern and Eastern Serbia                                            | 371  | 25.4        | 35 | 31.3        |        |
| <b>Societal level</b>                                                  |      |             |    |             |        |
| <b>Neighbors' interest in their life, in what is happening to them</b> |      |             |    |             | 0.671  |
| Very interested                                                        | 887  | 60.8        | 73 | 65.2        |        |
| Interested                                                             | 474  | 32.5        | 33 | 29.5        |        |
| Indifferent                                                            | 68   | 4.7         | 3  | 2.7         |        |
| Little interested                                                      | 25   | 1.7         | 2  | 1.8         |        |
| Not interested                                                         | 5    | 0.3         | 1  | 0.9         |        |
| <b>Getting necessary help from neighbor is</b>                         |      |             |    |             | 0.007  |
| Very easy                                                              | 259  | 17.8        | 20 | 17.9        |        |
| Easy                                                                   | 544  | 37.3        | 40 | 35.7        |        |
| Possible                                                               | 483  | 33.1        | 29 | 25.9        |        |
| Difficult                                                              | 143  | 9.8         | 15 | 13.4        |        |
| Very difficult                                                         | 30   | 2.1         | 8  | 7.1         |        |
| <b>Tracking health information by media</b>                            |      |             |    |             |        |
| TV (yes/occasionally)                                                  | 843  | 58.6        | 55 | 49.5        | 0.103  |
| No                                                                     | 596  | 41.4        | 56 | 50.5        |        |
| Internet (yes/occasionally)                                            | 808  | 55.7        | 67 | 60.4        | 0.261  |
| No                                                                     | 642  | 44.3        | 44 | 39.6        |        |
| Newspapers (yes/occasionally)                                          | 549  | 37.9        | 21 | 20.8        | 0.063  |
| No                                                                     | 900  | 62.1        | 80 | 79.2        |        |
| Radio (yes/occasionally)                                               | 289  | 19.9        | 18 | 16.2        | 0.255  |
| No                                                                     | 1161 | 80.1        | 93 | 83.8        |        |

\*Pearson Chi Square test, \*\* Consuming six or more alcoholic beverages in a row. # one-way ANOVA F=0,052; df=1.

**Table S11. Violence victimization according to the source of help they have requested from in the last 12 months, young people in Serbia age 15–24 years(n = 1571), 2013.**

| Requested help from<br>n (%) | Type and place of violence victimization |                                  |                             |                       |                                      |                          |
|------------------------------|------------------------------------------|----------------------------------|-----------------------------|-----------------------|--------------------------------------|--------------------------|
|                              | Physical & psychological<br>n=207(100%)  | Only psychological<br>n=94(100%) | Only physical<br>n=18(100%) | At home<br>n=44(100%) | At school / workplace<br>n=106(100%) | On street<br>n=112(100%) |
| Family, friends              | 72 (41%)                                 | 31 (36%)                         | 6 (35%)                     | 16 (41%)              | 41 (44%)                             | 41 (45%)                 |
| Police                       | 25 (15%)                                 | 3 (4%)                           | 2 (12%)                     | 8 (26%)               | 10 (11%)                             | 15 (16%)                 |
| Teacher, professor           | 25 (15%)                                 | 9 (11%)                          | 1 (6%)                      | 7 (19%)               | 20 (21%)                             | 10 (11%)                 |
| Social worker                | 10 (6%)                                  | 3 (3%)                           | 0                           | 6 (15%)               | 5 (6%)                               | 5 (5%)                   |
| Medical worker               | 8 (5%)                                   | 2 (2%)                           | 0                           | 5 (13%)               | 5 (6%)                               | 4 (4%)                   |
| SOS service                  | 6 (4%)                                   | 2 (2%)                           | 0                           | 2 (6%)                | 4 (4%)                               | 4 (4%)                   |
| <i>Response Rates</i>        | <i>(80-84%)</i>                          | <i>(90-91%)</i>                  | <i>(94%)</i>                | <i>(71-87%)</i>       | <i>(85-90%)</i>                      | <i>(80-84%)</i>          |

**Table S12. Distribution of violence perpetrators in the last 12 months, per type of violence, young people in Serbia age 15-24 years (n = 1571), 2013.**

| <b>Type of violence perpetration</b> | <b>N (%)</b> |
|--------------------------------------|--------------|
| Psychological (n= 1586)              | 111 (7.0%)   |
| <i>Response rate</i>                 | <i>92.1%</i> |
| Physical (n= 1571)                   | 112 (7.1%)   |
| <i>Response rate</i>                 | <i>91.8%</i> |
| Psychological and physical (n= 1574) | 177 (10.3)   |
| <i>Response rate</i>                 | <i>91.4%</i> |
